# Supplementary material for: Crystal structures and stability of trigonal KLnF4fluorides (Ln = Y, Ho, Er, Tm, Yb)
Source: Royal Society of Chemistry journal article supplement (doi:10.1039/c2dt31483e), 2012-10-19
Supplement: c2dt31483e.pdf [file c2dt31483e.pdf]

**Table 1** Atomic coordinates and isotropic displacement parameters in KHoF<sub>4</sub> at ambient pressure.

| Atom | x           | y           | z          | U <sub>iso</sub> |
|------|-------------|-------------|------------|------------------|
| Ho1  | 0.13092(3)  | 0.89028(4)  | 0.32997(5) | 0.00647(8)       |
| Ho2  | 0.28333(4)  | 0.73244(4)  | 0.31985(6) | 0.00601(8)       |
| Ho3  | 0.77991(5)  | 0.20619(4)  | 0.33963(4) | 0.00640(8)       |
| Ho4  | 0.94280(4)  | 0.05934(5)  | 0.32538(7) | 0.00682(8)       |
| Ho5  | 0.45263(5)  | 0.54464(6)  | 0.32348(4) | 0.00677(7)       |
| Ho6  | 0.60445(4)  | 0.38679(4)  | 0.34418(3) | 0.00634(8)       |
| K1   | 0.7812(2)   | 0.71865(19) | 0.3212(2)  | 0.0188(7)        |
| K2   | 0.26731(18) | 0.22010(18) | 0.3473(2)  | 0.0158(6)        |
| K3   | 0.10348(19) | 0.3955(2)   | 0.3126(2)  | 0.0178(5)        |
| K4   | 0.6114(2)   | 0.87697(17) | 0.3469(2)  | 0.0171(6)        |
| K5   | 0.9492(2)   | 0.56257(20) | 0.3449(2)  | 0.0194(6)        |
| K6   | 0.45537(17) | 0.06479(14) | 0.3138(2)  | 0.0158(5)        |
| F1   | 0.1314(4)   | 0.9341(3)   | 0.1128(4)  | 0.0158(9)        |
| F2   | 0.0694(4)   | 0.8779(4)   | 0.5400(4)  | 0.0176(10)       |
| F3   | 0.2103(4)   | 0.5940(3)   | 0.4670(5)  | 0.0224(7)        |
| F4   | 0.3341(4)   | 0.7293(3)   | 0.6513(7)  | 0.0305(8)        |
| F5   | 0.7379(4)   | 0.2035(4)   | 0.5577(5)  | 0.0176(10)       |
| F6   | 0.7885(3)   | 0.2679(4)   | 0.1307(5)  | 0.0158(9)        |
| F7   | -0.0034(4)  | 0.0602(3)   | 0.6599(6)  | 0.0305(8)        |
| F8   | -0.1221(4)  | -0.0774(3)  | 0.4741(4)  | 0.0224(7)        |
| F9   | 0.3905(4)   | 0.5374(4)   | 0.5331(4)  | 0.0176(10)       |
| F10  | 0.4569(4)   | 0.5886(3)   | 0.1062(5)  | 0.0158(9)        |
| F11  | 0.5463(4)   | 0.2904(4)   | 0.5350(5)  | 0.0224(7)        |
| F12  | 0.7361(4)   | 0.3949(3)   | 0.6776(6)  | 0.0305(8)        |
| F13  | 0.7675(4)   | 0.7281(3)   | 0.0649(5)  | 0.0162(7)        |
| F14  | 0.8078(4)   | 0.7233(3)   | 0.5753(5)  | 0.0150(7)        |
| F15  | 0.2479(3)   | 0.2233(3)   | 0.6072(5)  | 0.0155(7)        |
| F16  | 0.8086(4)   | 0.0749(4)   | 0.4302(5)  | 0.0147(8)        |
| F17  | 0.1306(3)   | 0.3946(3)   | 0.5673(5)  | 0.0150(7)        |
| F18  | 0.0917(3)   | 0.4027(3)   | 0.0612(4)  | 0.0162(7)        |
| F19  | 0.1539(3)   | 0.7554(3)   | 0.4241(4)  | 0.0147(8)        |
| F20  | 0.5892(3)   | 0.8837(3)   | 0.6032(4)  | 0.0155(7)        |
| F21  | 0.9377(3)   | 0.5758(3)   | 0.6002(5)  | 0.0155(7)        |
| F22  | -0.5325(4)  | 0.4106(4)   | 0.4255(5)  | 0.0147(8)        |
| F23  | 0.4846(3)   | 0.0702(3)   | 0.5686(4)  | 0.0150(7)        |
| F24  | 0.4535(4)   | 0.0868(3)   | 0.0582(5)  | 0.0162(7)        |

**Table 2** Atomic coordinates and isotropic displacement parameters in KErF<sub>4</sub> at ambient pressure.

| Atom | x          | y           | z          | U <sub>iso</sub> |
|------|------------|-------------|------------|------------------|
| Er1  | 0.12924(4) | 0.88850(5)  | 0.33061(6) | 0.00773(10)      |
| Er2  | 0.28257(4) | 0.73204(5)  | 0.32051(6) | 0.00657(9)       |
| Er3  | 0.77948(5) | 0.20594(5)  | 0.33866(5) | 0.00651(9)       |
| Er4  | 0.94245(6) | 0.05903(6)  | 0.32607(9) | 0.00784(10)      |
| Er5  | 0.45238(7) | 0.54450(7)  | 0.32453(6) | 0.00737(9)       |
| Er6  | 0.60496(4) | 0.38766(4)  | 0.34247(4) | 0.00627(10)      |
| K1   | 0.7818(2)  | 0.7210(2)   | 0.3192(2)  | 0.0168(7)        |
| K2   | 0.2670(2)  | 0.2202(2)   | 0.3480(3)  | 0.0188(7)        |
| K3   | 0.1042(2)  | 0.3948(2)   | 0.3134(3)  | 0.0168(6)        |
| K4   | 0.6111(3)  | 0.8773(2)   | 0.3460(3)  | 0.0213(8)        |
| K5   | 0.9493(3)  | 0.5620(2)   | 0.3450(3)  | 0.0223(8)        |
| K6   | 0.4543(2)  | 0.06467(16) | 0.3149(2)  | 0.0161(6)        |
| F1   | 0.1313(4)  | 0.9347(4)   | 0.1132(5)  | 0.0153(10)       |
| F2   | 0.0689(5)  | 0.8763(5)   | 0.5408(5)  | 0.0184(12)       |
| F3   | 0.2094(4)  | 0.5943(4)   | 0.4685(5)  | 0.0234(9)        |
| F4   | 0.3359(6)  | 0.7290(3)   | 0.6540(8)  | 0.0341(6)        |
| F5   | 0.7363(5)  | 0.2032(5)   | 0.5553(6)  | 0.0184(12)       |
| F6   | 0.7880(4)  | 0.2676(4)   | 0.1295(5)  | 0.0153(10)       |
| F7   | 0.0004(5)  | 0.0602(3)   | 0.6622(7)  | 0.0341(6)        |
| F8   | -0.1241(4) | -0.0762(4)  | 0.4772(5)  | 0.0234(9)        |
| F9   | 0.3907(4)  | 0.5368(5)   | 0.5339(5)  | 0.0184(12)       |
| F10  | 0.4571(5)  | 0.5899(4)   | 0.1081(5)  | 0.0153(10)       |
| F11  | 0.5466(5)  | 0.2887(4)   | 0.5306(5)  | 0.0234(9)        |
| F12  | -0.2666(6) | -0.6056(4)  | 0.6751(7)  | 0.0341(6)        |
| F13  | 0.7678(5)  | 0.7290(4)   | 0.0628(6)  | 0.0183(9)        |
| F14  | 0.8088(5)  | 0.7239(3)   | 0.5720(6)  | 0.0165(10)       |
| F15  | 0.2484(4)  | 0.2237(4)   | 0.6052(5)  | 0.0171(9)        |
| F16  | 0.8082(5)  | 0.0743(5)   | 0.4283(6)  | 0.0154(10)       |
| F17  | 0.1319(4)  | 0.3933(4)   | 0.5656(6)  | 0.0165(10)       |
| F18  | 0.0922(4)  | 0.4018(4)   | 0.0584(5)  | 0.0183(9)        |
| F19  | 0.1535(4)  | 0.7551(4)   | 0.4228(5)  | 0.0154(10)       |
| F20  | 0.5883(4)  | 0.8836(4)   | 0.6029(5)  | 0.0171(9)        |
| F21  | 0.9365(4)  | 0.5741(4)   | 0.5987(5)  | 0.0171(9)        |
| F22  | -0.5311(5) | 0.4112(4)   | 0.4238(5)  | 0.0154(10)       |
| F23  | 0.4842(4)  | 0.0682(4)   | 0.5660(5)  | 0.0165(10)       |
| F24  | 0.4519(5)  | 0.0857(4)   | 0.0570(6)  | 0.0183(9)        |

**Table 3** Atomic coordinates and isotropic displacement parameters in  $\text{KTmF}_4$  at ambient pressure.

| Atom | x           | y           | z           | $U_{\text{iso}}$ |
|------|-------------|-------------|-------------|------------------|
| Tm1  | 0.12764(4)  | 0.88686(4)  | 0.66930(5)  | 0.00854(8)       |
| Tm2  | 0.28098(4)  | 0.73088(4)  | 0.67972(5)  | 0.00683(8)       |
| Tm3  | 0.77849(4)  | 0.20520(4)  | 0.66356(4)  | 0.00623(6)       |
| Tm4  | 0.94085(6)  | 0.05764(6)  | 0.67311(8)  | 0.00832(8)       |
| Tm5  | 0.45217(6)  | 0.54475(6)  | 0.67551(4)  | 0.00666(6)       |
| Tm6  | 0.60485(4)  | 0.38809(4)  | 0.66008(4)  | 0.00624(8)       |
| K1   | 0.26504(19) | 0.22064(19) | 0.6510(2)   | 0.0169(5)        |
| K2   | 0.7811(2)   | 0.7188(2)   | 0.6814(2)   | 0.0214(6)        |
| K3   | 0.6068(2)   | 0.87666(16) | 0.65505(17) | 0.0152(5)        |
| K4   | 0.1039(2)   | 0.3920(2)   | 0.6833(2)   | 0.0182(6)        |
| K5   | 0.45351(19) | 0.06488(19) | 0.68443(18) | 0.0183(5)        |
| K6   | 0.9447(2)   | 0.55911(19) | 0.6549(2)   | 0.0185(6)        |
| F1   | 0.1340(4)   | 0.9396(4)   | 0.8845(4)   | 0.0190(11)       |
| F2   | 0.0712(3)   | 0.8783(3)   | 0.4580(4)   | 0.0149(9)        |
| F3   | 0.2087(4)   | 0.5951(3)   | 0.5294(4)   | 0.0217(7)        |
| F4   | 0.3375(5)   | 0.7291(3)   | 0.3462(6)   | 0.0315(7)        |
| F5   | 0.7366(3)   | 0.2044(4)   | 0.4468(4)   | 0.0149(9)        |
| F6   | 0.7911(4)   | 0.2707(4)   | 0.8717(4)   | 0.0190(11)       |
| F7   | 0.0083(4)   | 0.0603(3)   | 0.3377(5)   | 0.0315(7)        |
| F8   | -0.1255(3)  | -0.0729(3)  | 0.5168(4)   | 0.0217(7)        |
| F9   | 0.3947(3)   | 0.5392(3)   | 0.4648(4)   | 0.0149(9)        |
| F10  | 0.4609(5)   | 0.5942(4)   | 0.8912(4)   | 0.0190(11)       |
| F11  | 0.5450(4)   | 0.2867(3)   | 0.4740(4)   | 0.0217(7)        |
| F12  | -0.2698(5)  | -0.6070(3)  | 0.3294(6)   | 0.0315(7)        |
| F13  | 0.7687(4)   | 0.7317(3)   | 0.9380(4)   | 0.0170(7)        |
| F14  | 0.8109(4)   | 0.7241(3)   | 0.4293(5)   | 0.0174(9)        |
| F15  | 0.2503(3)   | 0.2258(3)   | 0.3962(4)   | 0.0161(7)        |
| F16  | 0.8065(4)   | 0.0739(4)   | 0.5735(4)   | 0.0143(8)        |
| F17  | 0.1331(4)   | 0.3930(3)   | 0.4342(4)   | 0.0174(9)        |
| F18  | 0.0930(3)   | 0.4030(3)   | 0.9398(4)   | 0.0170(7)        |
| F19  | 0.1512(3)   | 0.7534(3)   | 0.5782(4)   | 0.0143(8)        |
| F20  | 0.5879(3)   | 0.8837(3)   | 0.3982(4)   | 0.0161(7)        |
| F21  | 0.9366(3)   | 0.5724(3)   | 0.4017(4)   | 0.0161(7)        |
| F22  | -0.5311(3)  | 0.4113(4)   | 1.5780(4)   | 0.0143(8)        |
| F23  | 0.4834(4)   | 0.0667(3)   | 0.4339(4)   | 0.0174(9)        |
| F24  | 0.4513(3)   | 0.0869(3)   | 0.9442(4)   | 0.0170(7)        |

**Table 4** Atomic coordinates and isotropic displacement parameters in Er:KYbF<sub>4</sub> at ambient pressure.

| Atom | x          | y           | z           | U <sub>iso</sub> |
|------|------------|-------------|-------------|------------------|
| Yb1  | 0.13032(3) | 0.88970(4)  | 0.67154(8)  | 0.00581(10)      |
| Yb2  | 0.27742(5) | 0.72800(5)  | 0.67585(10) | 0.00714(17)      |
| Yb3  | 0.78381(7) | 0.21038(6)  | 0.66442(6)  | 0.00503(14)      |
| Yb4  | 0.93987(8) | 0.05710(8)  | 0.67429(12) | 0.00646(15)      |
| Yb5  | 0.45319(9) | 0.54605(10) | 0.67458(8)  | 0.00765(18)      |
| Yb6  | 0.60253(5) | 0.38535(5)  | 0.65929(5)  | 0.00495(11)      |
| K1   | 0.2668(3)  | 0.2173(3)   | 0.6549(4)   | 0.0154(9)        |
| K2   | 0.7787(3)  | 0.7165(3)   | 0.6877(4)   | 0.0223(12)       |
| K3   | 0.6052(3)  | 0.8798(3)   | 0.6585(4)   | 0.0179(10)       |
| K4   | 0.1049(3)  | 0.3975(3)   | 0.6896(3)   | 0.0160(8)        |
| K5   | 0.4542(3)  | 0.0614(3)   | 0.6859(4)   | 0.0195(11)       |
| K6   | 0.9458(3)  | 0.5596(3)   | 0.6625(3)   | 0.0095(7)        |
| F1   | 0.1328(6)  | 0.9374(6)   | 0.8843(9)   | 0.0176(16)       |
| F2   | 0.0690(6)  | 0.8783(6)   | 0.4594(6)   | 0.0135(13)       |
| F3   | 0.2067(5)  | 0.5985(5)   | 0.5200(7)   | 0.0199(10)       |
| F4   | 0.3440(7)  | 0.7280(4)   | 0.3414(9)   | 0.0316(11)       |
| F5   | 0.7372(6)  | 0.2048(6)   | 0.4470(8)   | 0.0135(13)       |
| F6   | 0.7919(6)  | 0.2713(6)   | 0.8699(7)   | 0.0176(16)       |
| F7   | 0.0015(7)  | 0.0602(4)   | 0.3368(10)  | 0.0316(11)       |
| F8   | -0.1236(5) | -0.0746(5)  | 0.5235(7)   | 0.0199(10)       |
| F9   | 0.3948(6)  | 0.5382(6)   | 0.4599(7)   | 0.0135(13)       |
| F10  | 0.4593(7)  | 0.5949(7)   | 0.8885(8)   | 0.0176(16)       |
| F11  | 0.5449(6)  | 0.2842(5)   | 0.4762(8)   | 0.0199(10)       |
| F12  | -0.2745(7) | -0.6061(5)  | 0.3272(11)  | 0.0316(11)       |
| F13  | 0.7665(6)  | 0.7312(5)   | 0.9371(8)   | 0.0157(13)       |
| F14  | 0.8053(6)  | 0.7234(5)   | 0.4265(8)   | 0.0119(11)       |
| F15  | 0.2483(5)  | 0.2220(5)   | 0.3936(8)   | 0.0167(14)       |
| F16  | 0.8101(6)  | 0.0775(6)   | 0.5701(8)   | 0.0164(15)       |
| F17  | 0.1328(5)  | 0.3939(5)   | 0.4313(8)   | 0.0119(11)       |
| F18  | 0.0961(6)  | 0.4070(5)   | 0.9390(8)   | 0.0157(13)       |
| F19  | 0.1509(5)  | 0.7547(6)   | 0.5748(7)   | 0.0164(15)       |
| F20  | 0.5896(5)  | 0.8865(6)   | 0.3969(8)   | 0.0167(14)       |
| F21  | 0.9339(6)  | 0.5726(7)   | 0.3975(10)  | 0.0167(14)       |
| F22  | -0.5272(7) | 0.4133(7)   | 0.5734(9)   | 0.0164(15)       |
| F23  | 0.4844(5)  | 0.0678(5)   | 0.4283(8)   | 0.0119(11)       |
| F24  | 0.4492(6)  | 0.0844(6)   | 0.9417(8)   | 0.0157(13)       |

**Table 5** Atomic coordinates and isotropic displacement parameters in KYF<sub>4</sub> at ambient pressure.

| Atom | x           | y            | z           | U <sub>iso</sub> |
|------|-------------|--------------|-------------|------------------|
| Y1   | 0.13055(3)  | 0.89040(3)   | 0.66619(4)  | 0.00575(7)       |
| Y2   | 0.28078(4)  | 0.73037(4)   | 0.67411(5)  | 0.00745(10)      |
| Y3   | 0.78105(4)  | 0.20748(4)   | 0.65710(4)  | 0.00633(8)       |
| Y4   | 0.94103(4)  | 0.05768(4)   | 0.66979(6)  | 0.00663(8)       |
| Y5   | 0.45274(4)  | 0.54494(5)   | 0.67143(4)  | 0.00674(8)       |
| Y6   | 0.60289(3)  | 0.38552(4)   | 0.65198(3)  | 0.00522(7)       |
| K1   | 0.26672(10) | 0.21929(11)  | 0.64643(12) | 0.0158(3)        |
| K2   | 0.78083(12) | 0.71936(12)  | 0.67589(13) | 0.0202(4)        |
| K3   | 0.61130(12) | 0.87785(10)  | 0.65016(11) | 0.0180(3)        |
| K4   | 0.10466(11) | 0.39538(12)  | 0.67984(12) | 0.0167(3)        |
| K5   | 0.45608(9)  | 0.06437(9)   | 0.68040(11) | 0.0151(3)        |
| K6   | 0.94765(11) | 0.56221(12)  | 0.65014(11) | 0.0182(3)        |
| F1   | 0.1309(2)   | 0.9354(2)    | 0.8839(2)   | 0.0152(5)        |
| F2   | 0.0702(2)   | 0.8784(2)    | 0.4569(2)   | 0.0176(6)        |
| F3   | 0.20735(19) | 0.59552(19)  | 0.5238(3)   | 0.0199(3)        |
| F4   | 0.3388(3)   | 0.72858(17)  | 0.3409(3)   | 0.0296(4)        |
| F5   | 0.7377(2)   | 0.2036(2)    | 0.4403(3)   | 0.0176(6)        |
| F6   | 0.78924(19) | 0.2701(2)    | 0.8667(3)   | 0.0152(5)        |
| F7   | -0.0014(3)  | 0.05974(17)  | 0.3346(3)   | 0.0296(4)        |
| F8   | 0.0761(2)   | -0.04768(18) | 0.1866(3)   | 0.0199(3)        |
| F9   | 0.3917(2)   | 0.5369(2)    | 0.4623(2)   | 0.0176(6)        |
| F10  | 0.4571(2)   | 0.5913(2)    | 0.8881(2)   | 0.0152(5)        |
| F11  | 0.54783(19) | 0.29041(19)  | 0.4623(3)   | 0.0199(3)        |
| F12  | -0.2663(2)  | -0.60517(18) | 0.3190(4)   | 0.0296(4)        |
| F13  | 0.7667(2)   | 0.72828(18)  | 0.9313(3)   | 0.0159(4)        |
| F14  | 0.8094(2)   | 0.72448(15)  | 0.4231(3)   | 0.0156(4)        |
| F15  | 0.24799(17) | 0.22319(18)  | 0.3903(3)   | 0.0152(4)        |
| F16  | 0.8089(2)   | 0.0749(2)    | 0.5653(3)   | 0.0144(4)        |
| F17  | 0.13261(19) | 0.39378(16)  | 0.4279(2)   | 0.0156(4)        |
| F18  | 0.09371(19) | 0.40422(19)  | 0.9355(2)   | 0.0159(4)        |
| F19  | 0.15200(18) | 0.75538(18)  | 0.5735(2)   | 0.0144(4)        |
| F20  | 0.59000(17) | 0.88469(18)  | 0.3935(2)   | 0.0152(4)        |
| F21  | 0.93653(19) | 0.5753(2)    | 0.3960(3)   | 0.0152(4)        |
| F22  | -0.4102(2)  | -0.94313(19) | 0.2380(2)   | 0.0144(4)        |
| F23  | 0.4854(2)   | 0.06895(16)  | 0.4277(2)   | 0.0156(4)        |
| F24  | 0.4524(2)   | 0.08634(19)  | 0.9383(3)   | 0.0159(4)        |

**Table 6** Selected distances and geometrical parameters (all in Å) in the structure of KHoF<sub>4</sub> at ambient conditions.

*Ho-F distances*

|             |          |             |          |             |          |
|-------------|----------|-------------|----------|-------------|----------|
| Ho1-F1      | 2.300(4) | Ho3-F5      | 2.298(5) | Ho5-F4      | 2.243(8) |
| Ho1-F2      | 2.287(4) | Ho3-F6      | 2.284(5) | Ho5-F9      | 2.295(5) |
| Ho1-F7      | 2.242(8) | Ho3-F12     | 2.243(8) | Ho5-F10     | 2.295(5) |
| Ho1-F13     | 2.176(4) | Ho3-F14     | 2.262(7) | Ho5-F18     | 2.175(4) |
| Ho1-F15     | 2.171(4) | Ho3-F16     | 2.291(6) | Ho5-F20     | 2.163(4) |
| Ho1-F17     | 2.274(7) | Ho3-F21     | 2.158(4) | Ho5-F22     | 2.269(6) |
| Ho1-F19     | 2.306(5) | Ho3-F24     | 2.176(5) | Ho5-F23     | 2.307(7) |
| <Ho1-F>     | 2.25     | <Ho3-F>     | 2.24     | <Ho5-F>     | 2.25     |
| range Ho1-F | 0.14     | range Ho3-F | 0.14     | range Ho5-F | 0.15     |

|             |          |             |          |             |          |
|-------------|----------|-------------|----------|-------------|----------|
| Ho2-F3      | 2.270(4) | Ho4-F1      | 2.232(5) | Ho6-F5      | 2.241(5) |
| Ho2-F3      | 2.266(5) | Ho4-F2      | 2.225(5) | Ho6-F6      | 2.224(5) |
| Ho2-F4      | 2.216(9) | Ho4-F7      | 2.220(8) | Ho6-F11     | 2.283(5) |
| Ho2-F9      | 2.218(5) | Ho4-F8      | 2.264(4) | Ho6-F11     | 2.249(6) |
| Ho2-F10     | 2.237(5) | Ho4-F8      | 2.268(5) | Ho6-F12     | 2.232(8) |
| Ho2-F17     | 2.270(6) | Ho4-F14     | 2.271(6) | Ho6-F22     | 2.288(6) |
| Ho2-F19     | 2.282(5) | Ho4-F16     | 2.289(6) | Ho6-F23     | 2.264(6) |
| <Ho2-F>     | 2.25     | <Ho4-F>     | 2.25     | <Ho6-F>     | 2.25     |
| range Ho2-F | 0.06     | range Ho4-F | 0.07     | range Ho6-F | 0.07     |

*K-F distances*

|            |          |            |          |            |          |
|------------|----------|------------|----------|------------|----------|
| K1-F2      | 3.065(6) | K3-F1      | 2.923(7) | K5-F6      | 3.080(6) |
| K1-F6      | 2.923(7) | K3-F3      | 2.906(5) | K5-F9      | 2.938(7) |
| K1-F8      | 2.953(5) | K3-F9      | 3.009(6) | K5-F11     | 2.915(6) |
| K1-F13     | 2.629(5) | K3-F14     | 2.873(5) | K5-F15     | 2.626(6) |
| K1-F14     | 2.616(5) | K3-F17     | 2.627(5) | K5-F19     | 2.937(4) |
| K1-F15     | 2.597(7) | K3-F18     | 2.575(5) | K5-F21     | 2.622(5) |
| K1-F18     | 2.540(6) | K3-F20     | 2.645(7) | K5-F22     | 2.607(5) |
| K1-F23     | 2.964(5) | K3-F24     | 2.646(6) | K5-F24     | 2.606(7) |
| <K1-F>     | 2.79     | <K3-F>     | 2.78     | <K5-F>     | 2.79     |
| range K1-F | 0.52     | range K3-F | 0.43     | range K5-F | 0.47     |

|            |          |            |          |            |          |
|------------|----------|------------|----------|------------|----------|
| K2-F1      | 2.892(6) | K4-F2      | 2.885(7) | K6-F5      | 2.879(7) |
| K2-F5      | 2.857(8) | K4-F4      | 3.047(5) | K6-F10     | 2.841(7) |
| K2-F7      | 2.995(5) | K4-F10     | 2.934(7) | K6-F12     | 2.874(5) |
| K2-F13     | 2.649(8) | K4-F16     | 2.929(4) | K6-F13     | 2.590(6) |
| K2-F15     | 2.668(5) | K4-F18     | 2.618(7) | K6-F17     | 2.863(4) |
| K2-F16     | 2.585(5) | K4-F19     | 2.641(5) | K6-F21     | 2.655(8) |
| K2-F20     | 2.655(5) | K4-F20     | 2.641(5) | K6-F23     | 2.627(5) |
| K2-F22     | 2.887(4) | K4-F21     | 2.594(6) | K6-F24     | 2.628(5) |
| <K2-F>     | 2.77     | <K4-F>     | 2.79     | <K6-F>     | 2.74     |
| range K2-F | 0.42     | range K4-F | 0.46     | range K6-F | 0.29     |

**Table 7** Selected distances and geometrical parameters (all in Å) in the structure of  $\text{KErF}_4$  at ambient conditions.

*Er-F distances*

|             |           |             |           |             |           |
|-------------|-----------|-------------|-----------|-------------|-----------|
| Er1-F1      | 2.299(5)  | Er3-F5      | 2.279(6)  | Er5-F4      | 2.230(11) |
| Er1-F2      | 2.274(5)  | Er3-F6      | 2.277(6)  | Er5-F9      | 2.280(5)  |
| Er1-F7      | 2.229(10) | Er3-F12     | 2.230(11) | Er5-F10     | 2.281(6)  |
| Er1-F13     | 2.170(5)  | Er3-F14     | 2.268(8)  | Er5-F18     | 2.171(5)  |
| Er1-F15     | 2.149(5)  | Er3-F16     | 2.281(7)  | Er5-F20     | 2.144(5)  |
| Er1-F17     | 2.260(8)  | Er3-F21     | 2.143(5)  | Er5-F22     | 2.248(7)  |
| Er1-F19     | 2.279(6)  | Er3-F24     | 2.172(6)  | Er5-F23     | 2.290(8)  |
| <Er1-F>     | 2.24      | <Er3-F>     | 2.24      | <Er5-F>     | 2.24      |
| range Er1-F | 0.15      | range Er3-F | 0.14      | range Er5-F | 0.15      |
|             |           |             |           |             |           |
| Er2-F3      | 2.259(5)  | Er4-F1      | 2.217(5)  | Er6-F5      | 2.226(6)  |
| Er2-F3      | 2.264(6)  | Er4-F2      | 2.215(6)  | Er6-F6      | 2.208(5)  |
| Er2-F4      | 2.205(11) | Er4-F7      | 2.201(10) | Er6-F11     | 2.266(5)  |
| Er2-F9      | 2.207(6)  | Er4-F8      | 2.257(5)  | Er6-F11     | 2.234(7)  |
| Er2-F10     | 2.228(6)  | Er4-F8      | 2.263(6)  | Er6-F12     | 2.215(10) |
| Er2-F17     | 2.272(7)  | Er4-F14     | 2.269(8)  | Er6-F22     | 2.265(7)  |
| Er2-F19     | 2.259(6)  | Er4-F16     | 2.266(7)  | Er6-F23     | 2.268(7)  |
| <Er2-F>     | 2.24      | <Er4-F>     | 2.24      | <Er6-F>     | 2.24      |
| range Er2-F | 0.06      | range Er4-F | 0.07      | range Er6-F | 0.06      |

*K-F distances*

|            |           |            |          |            |           |
|------------|-----------|------------|----------|------------|-----------|
| K1-F2      | 3.026(8)  | K3-F1      | 2.905(9) | K5-F6      | 3.061(8)  |
| K1-F6      | 2.945(8)  | K3-F3      | 2.905(6) | K5-F9      | 2.910(9)  |
| K1-F8      | 2.957(6)  | K3-F9      | 3.009(7) | K5-F11     | 2.947(8)  |
| K1-F13     | 2.618(6)  | K3-F14     | 2.882(6) | K5-F15     | 2.622(7)  |
| K1-F14     | 2.594(7)  | K3-F17     | 2.592(7) | K5-F19     | 2.919(5)  |
| K1-F15     | 2.590(9)  | K3-F18     | 2.601(6) | K5-F21     | 2.595(6)  |
| K1-F18     | 2.518(7)  | K3-F20     | 2.626(9) | K5-F22     | 2.616(6)  |
| K1-F23     | 2.980(6)  | K3-F24     | 2.624(8) | K5-F24     | 2.597(10) |
| <K1-F>     | 2.74      | <K3-F>     | 2.77     | <K5-F>     | 2.78      |
| range K1-F | 0.51      | range K3-F | 0.42     | range K5-F | 0.46      |
|            |           |            |          |            |           |
| K2-F1      | 2.878(8)  | K4-F2      | 2.854(9) | K6-F5      | 2.885(8)  |
| K2-F5      | 2.873(10) | K4-F4      | 3.056(7) | K6-F10     | 2.843(9)  |
| K2-F7      | 3.032(6)  | K4-F10     | 2.936(8) | K6-F12     | 2.900(7)  |
| K2-F13     | 2.637(10) | K4-F16     | 2.907(5) | K6-F13     | 2.564(7)  |
| K2-F15     | 2.629(6)  | K4-F18     | 2.596(9) | K6-F17     | 2.877(5)  |
| K2-F16     | 2.600(6)  | K4-F19     | 2.634(6) | K6-F21     | 2.646(10) |
| K2-F20     | 2.652(7)  | K4-F20     | 2.636(6) | K6-F23     | 2.582(6)  |
| K2-F22     | 2.884(5)  | K4-F21     | 2.597(8) | K6-F24     | 2.639(6)  |
| <K2-F>     | 2.77      | <K4-F>     | 2.78     | <K6-F>     | 2.74      |
| range K2-F | 0.43      | range K4-F | 0.46     | range K6-F | 0.44      |

**Table 8** Selected distances and geometrical parameters (all in Å) in the structure of  $\text{KTmF}_4$  at ambient conditions.

*Tm-F distances*

|             |          |             |          |             |          |
|-------------|----------|-------------|----------|-------------|----------|
| Tm1-F1      | 2.294(4) | Tm3-F5      | 2.276(4) | Tm5-F4      | 2.213(9) |
| Tm1-F2      | 2.269(4) | Tm3-F6      | 2.276(4) | Tm5-F9      | 2.273(4) |
| Tm1-F7      | 2.212(8) | Tm3-F12     | 2.228(9) | Tm5-F10     | 2.281(4) |
| Tm1-F13     | 2.153(4) | Tm3-F14     | 2.256(7) | Tm5-F18     | 2.160(4) |
| Tm1-F15     | 2.136(4) | Tm3-F16     | 2.268(6) | Tm5-F20     | 2.133(4) |
| Tm1-F17     | 2.251(7) | Tm3-F21     | 2.131(4) | Tm5-F22     | 2.238(6) |
| Tm1-F19     | 2.264(5) | Tm3-F24     | 2.159(5) | Tm5-F23     | 2.273(7) |
| <Tm1-F>     | 2.23     | <Tm3-F>     | 2.23     | <Tm5-F>     | 2.22     |
| range Tm1-F | 0.15     | range Tm3-F | 0.15     | range Tm5-F | 0.15     |

|             |          |             |          |             |          |
|-------------|----------|-------------|----------|-------------|----------|
| Tm2-F3      | 2.252(4) | Tm4-F1      | 2.199(5) | Tm6-F5      | 2.215(5) |
| Tm2-F3      | 2.261(5) | Tm4-F2      | 2.205(4) | Tm6-F6      | 2.192(5) |
| Tm2-F4      | 2.204(9) | Tm4-F7      | 2.183(8) | Tm6-F11     | 2.260(4) |
| Tm2-F9      | 2.206(4) | Tm4-F8      | 2.247(4) | Tm6-F11     | 2.240(5) |
| Tm2-F10     | 2.217(5) | Tm4-F8      | 2.261(4) | Tm6-F12     | 2.192(8) |
| Tm2-F17     | 2.263(7) | Tm4-F14     | 2.265(7) | Tm6-F22     | 2.257(6) |
| Tm2-F19     | 2.255(5) | Tm4-F16     | 2.256(6) | Tm6-F23     | 2.258(6) |
| <Tm2-F>     | 2.24     | <Tm4-F>     | 2.23     | <Tm6-F>     | 2.23     |
| range Tm2-F | 0.06     | range Tm4-F | 0.08     | range Tm6-F | 0.07     |

*K-F distances*

|            |          |            |          |            |          |
|------------|----------|------------|----------|------------|----------|
| K1-F1      | 2.899(7) | K3-F2      | 2.887(7) | K5-F5      | 2.870(6) |
| K1-F5      | 2.918(7) | K3-F4      | 3.034(6) | K5-F10     | 2.832(8) |
| K1-F7      | 3.126(5) | K3-F10     | 2.935(7) | K5-F12     | 2.927(6) |
| K1-F13     | 2.653(8) | K3-F16     | 2.916(4) | K5-F13     | 2.567(6) |
| K1-F15     | 2.598(5) | K3-F18     | 2.610(7) | K5-F17     | 2.885(5) |
| K1-F16     | 2.626(5) | K3-F19     | 2.628(5) | K5-F21     | 2.629(8) |
| K1-F20     | 2.638(6) | K3-F20     | 2.626(5) | K5-F23     | 2.574(5) |
| K1-F22     | 2.880(4) | K3-F21     | 2.583(6) | K5-F24     | 2.656(5) |
| <K1-F>     | 2.79     | <K3-F>     | 2.78     | <K5-F>     | 2.74     |
| range K1-F | 0.53     | range K3-F | 0.45     | range K5-F | 0.36     |

|            |          |            |          |            |          |
|------------|----------|------------|----------|------------|----------|
| K2-F2      | 3.007(6) | K4-F1      | 2.866(8) | K6-F6      | 3.041(7) |
| K2-F6      | 2.900(7) | K4-F3      | 2.930(5) | K6-F9      | 2.937(7) |
| K2-F8      | 3.044(5) | K4-F9      | 2.999(6) | K6-F11     | 2.921(6) |
| K2-F13     | 2.622(5) | K4-F14     | 2.891(5) | K6-F15     | 2.608(6) |
| K2-F14     | 2.587(5) | K4-F17     | 2.560(5) | K6-F19     | 2.931(4) |
| K2-F15     | 2.594(7) | K4-F18     | 2.616(4) | K6-F21     | 2.583(5) |
| K2-F18     | 2.533(6) | K4-F20     | 2.620(7) | K6-F22     | 2.629(5) |
| K2-F23     | 2.950(5) | K4-F24     | 2.622(6) | K6-F24     | 2.588(7) |
| <K2-F>     | 2.78     | <K4-F>     | 2.76     | <K6-F>     | 2.78     |
| range K2-F | 0.51     | range K4-F | 0.44     | range K6-F | 0.46     |



**Table 9** Selected distances and geometrical parameters (all in Å) in the structure of Er:KYbF<sub>4</sub> at ambient conditions.

---

*Yb-F distances*

|             |           |             |           |             |           |
|-------------|-----------|-------------|-----------|-------------|-----------|
| Yb1-F1      | 2.250(9)  | Yb3-F5      | 2.286(8)  | Yb5-F4      | 2.194(13) |
| Yb1-F2      | 2.288(7)  | Yb3-F6      | 2.229(8)  | Yb5-F9      | 2.304(7)  |
| Yb1-F7      | 2.207(13) | Yb3-F12     | 2.210(14) | Yb5-F10     | 2.259(9)  |
| Yb1-F13     | 2.108(7)  | Yb3-F14     | 2.224(11) | Yb5-F18     | 2.103(7)  |
| Yb1-F15     | 2.153(7)  | Yb3-F16     | 2.282(10) | Yb5-F20     | 2.137(7)  |
| Yb1-F17     | 2.221(11) | Yb3-F21     | 2.138(8)  | Yb5-F22     | 2.259(11) |
| Yb1-F19     | 2.274(9)  | Yb3-F24     | 2.103(8)  | Yb5-F23     | 2.252(11) |
| <Yb1-F>     | 2.21      | <Yb3-F>     | 2.21      | <Yb5-F>     | 2.22      |
| range Yb1-F | 0.18      | range Yb3-F | 0.19      | range Yb5-F | 0.20      |

|             |           |             |           |             |           |
|-------------|-----------|-------------|-----------|-------------|-----------|
| Yb2-F3      | 2.229(7)  | Yb4-F1      | 2.223(9)  | Yb6-F5      | 2.186(8)  |
| Yb2-F3      | 2.274(8)  | Yb4-F2      | 2.163(7)  | Yb6-F6      | 2.217(7)  |
| Yb2-F4      | 2.183(13) | Yb4-F7      | 2.197(14) | Yb6-F11     | 2.225(8)  |
| Yb2-F9      | 2.162(7)  | Yb4-F8      | 2.211(7)  | Yb6-F11     | 2.252(9)  |
| Yb2-F10     | 2.220(8)  | Yb4-F8      | 2.279(8)  | Yb6-F12     | 2.170(14) |
| Yb2-F17     | 2.262(9)  | Yb4-F14     | 2.271(10) | Yb6-F22     | 2.221(11) |
| Yb2-F19     | 2.236(9)  | Yb4-F16     | 2.242(10) | Yb6-F23     | 2.230(9)  |
| <Yb2-F>     | 2.22      | <Yb4-F>     | 2.23      | <Yb6-F>     | 2.21      |
| range Yb2-F | 0.11      | range Yb4-F | 0.12      | range Yb6-F | 0.08      |

*K-F distances*

|            |           |            |           |            |           |
|------------|-----------|------------|-----------|------------|-----------|
| K1-F1      | 2.920(11) | K3-F2      | 2.915(11) | K5-F5      | 2.898(11) |
| K1-F5      | 2.855(12) | K3-F4      | 3.125(8)  | K5-F10     | 2.822(13) |
| K1-F7      | 3.001(8)  | K3-F10     | 2.901(12) | K5-F12     | 3.007(9)  |
| K1-F13     | 2.617(13) | K3-F16     | 2.962(7)  | K5-F13     | 2.577(9)  |
| K1-F15     | 2.661(9)  | K3-F18     | 2.648(12) | K5-F17     | 2.831(7)  |
| K1-F16     | 2.544(9)  | K3-F19     | 2.561(9)  | K5-F21     | 2.595(14) |
| K1-F20     | 2.637(9)  | K3-F20     | 2.662(9)  | K5-F23     | 2.635(9)  |
| K1-F22     | 2.940(8)  | K3-F21     | 2.521(10) | K5-F24     | 2.614(9)  |
| <K1-F>     | 2.77      | <K3-F>     | 2.79      | <K5-F>     | 2.75      |
| range K1-F | 0.46      | range K3-F | 0.60      | range K5-F | 0.43      |

|            |           |            |           |            |           |
|------------|-----------|------------|-----------|------------|-----------|
| K2-F2      | 3.012(10) | K4-F1      | 2.945(13) | K6-F6      | 3.087(9)  |
| K2-F6      | 2.907(11) | K4-F3      | 2.985(7)  | K6-F9      | 2.841(11) |
| K2-F8      | 3.034(8)  | K4-F9      | 2.882(10) | K6-F11     | 2.916(9)  |
| K2-F13     | 2.546(9)  | K4-F14     | 2.829(7)  | K6-F15     | 2.605(9)  |
| K2-F14     | 2.664(9)  | K4-F17     | 2.646(8)  | K6-F19     | 2.947(6)  |
| K2-F15     | 2.556(12) | K4-F18     | 2.534(9)  | K6-F21     | 2.699(10) |
| K2-F18     | 2.572(10) | K4-F20     | 2.640(12) | K6-F22     | 2.507(9)  |
| K2-F23     | 2.878(7)  | K4-F24     | 2.592(10) | K6-F24     | 2.605(12) |
| <K2-F>     | 2.77      | <K4-F>     | 2.76      | <K6-F>     | 2.78      |
| range K2-F | 0.49      | range K4-F | 0.45      | range K6-F | 0.58      |

---

**Table 10** Selected distances and geometrical parameters (all in Å) in the structure of KYF<sub>4</sub> at ambient conditions.

---

*Y-F distances*

|            |          |            |          |            |          |
|------------|----------|------------|----------|------------|----------|
| Y1-F1      | 2.307(2) | Y3-F5      | 2.286(3) | Y5-F4      | 2.231(5) |
| Y1-F2      | 2.273(3) | Y3-F6      | 2.293(3) | Y5-F9      | 2.281(3) |
| Y1-F7      | 2.232(5) | Y3-F12     | 2.235(5) | Y5-F10     | 2.295(3) |
| Y1-F13     | 2.164(2) | Y3-F14     | 2.267(4) | Y5-F18     | 2.155(2) |
| Y1-F15     | 2.171(2) | Y3-F16     | 2.302(3) | Y5-F20     | 2.169(2) |
| Y1-F17     | 2.252(4) | Y3-F21     | 2.157(2) | Y5-F22     | 2.260(4) |
| Y1-F19     | 2.285(3) | Y3-F24     | 2.153(3) | Y5-F23     | 2.291(4) |
| <Y1-F>     | 2.24     | <Y3-F>     | 2.24     | <Y5-F>     | 2.24     |
| range Y1-F | 0.14     | range Y3-F | 0.15     | range Y5-F | 0.14     |
|            |          |            |          |            |          |
| Y2-F3      | 2.256(3) | Y4-F1      | 2.221(3) | Y6-F5      | 2.227(3) |
| Y2-F3      | 2.286(3) | Y4-F2      | 2.217(3) | Y6-F6      | 2.207(3) |
| Y2-F4      | 2.203(5) | Y4-F7      | 2.210(5) | Y6-F11     | 2.260(3) |
| Y2-F9      | 2.212(3) | Y4-F8      | 2.289(2) | Y6-F11     | 2.254(3) |
| Y2-F10     | 2.228(3) | Y4-F8      | 2.242(3) | Y6-F12     | 2.219(4) |
| Y2-F17     | 2.274(3) | Y4-F14     | 2.270(4) | Y6-F22     | 2.274(4) |
| Y2-F19     | 2.269(3) | Y4-F16     | 2.270(3) | Y6-F23     | 2.270(3) |
| <Y2-F>     | 2.25     | <Y4-F>     | 2.24     | <Y6-F>     | 2.24     |
| range Y2-F | 0.08     | range Y4-F | 0.08     | range Y6-F | 0.07     |

*K-F distances*

|            |          |            |          |            |          |
|------------|----------|------------|----------|------------|----------|
| K1-F1      | 2.880(4) | K3-F2      | 2.882(4) | K5-F5      | 2.896(4) |
| K1-F5      | 2.879(5) | K3-F4      | 3.113(3) | K5-F10     | 2.849(4) |
| K1-F7      | 3.011(3) | K3-F10     | 2.953(4) | K5-F12     | 2.896(3) |
| K1-F13     | 2.645(4) | K3-F16     | 2.925(3) | K5-F13     | 2.588(3) |
| K1-F15     | 2.627(3) | K3-F18     | 2.611(4) | K5-F17     | 2.895(2) |
| K1-F16     | 2.600(3) | K3-F19     | 2.643(3) | K5-F21     | 2.642(4) |
| K1-F20     | 2.656(3) | K3-F20     | 2.640(3) | K5-F23     | 2.604(3) |
| K1-F22     | 2.877(3) | K3-F21     | 2.587(3) | K5-F24     | 2.650(3) |
| <K1-F>     | 2.77     | <K3-F>     | 2.79     | <K5-F>     | 2.75     |
| range K1-F | 0.41     | range K3-F | 0.53     | range K5-F | 0.31     |
|            |          |            |          |            |          |
| K2-F2      | 3.039(4) | K4-F1      | 2.910(4) | K6-F6      | 3.069(3) |
| K2-F6      | 2.937(4) | K4-F3      | 2.925(3) | K6-F9      | 2.937(4) |
| K2-F8      | 2.971(3) | K4-F9      | 3.013(4) | K6-F11     | 2.922(3) |
| K2-F13     | 2.618(3) | K4-F14     | 2.905(3) | K6-F15     | 2.625(3) |
| K2-F14     | 2.603(3) | K4-F17     | 2.599(3) | K6-F19     | 2.924(2) |
| K2-F15     | 2.599(4) | K4-F18     | 2.617(3) | K6-F21     | 2.606(3) |
| K2-F18     | 2.550(3) | K4-F20     | 2.638(4) | K6-F22     | 2.622(3) |
| K2-F23     | 2.978(3) | K4-F24     | 2.636(3) | K6-F24     | 2.612(4) |
| <K2-F>     | 2.79     | <K4-F>     | 2.78     | <K6-F>     | 2.79     |
| range K2-F | 0.49     | range K4-F | 0.41     | range K6-F | 0.46     |

---

**Table 11** Atomic coordinates and isotropic displacement parameters in Er:KYbF<sub>4</sub> at 3.98 GPa.

| Atom | x           | y           | z           | U <sub>iso</sub> |
|------|-------------|-------------|-------------|------------------|
| Yb1  | 0.13433(12) | 0.89287(13) | 0.6710(2)   | 0.0121(2)        |
| Yb2  | 0.28475(16) | 0.73326(14) | 0.6809(2)   | 0.0125(2)        |
| Yb3  | 0.77966(18) | 0.20538(15) | 0.65941(18) | 0.0121(2)        |
| Yb4  | 0.94283(17) | 0.05946(19) | 0.6763(3)   | 0.0125(2)        |
| Yb5  | 0.45111(19) | 0.5417(2)   | 0.67879(18) | 0.0121(2)        |
| Yb6  | 0.60383(13) | 0.38564(16) | 0.65423(16) | 0.0125(2)        |
| K1   | 0.2653(8)   | 0.2183(7)   | 0.6523(13)  | 0.027(2)         |
| K2   | 0.7829(7)   | 0.7152(7)   | 0.6807(9)   | 0.0181(14)       |
| K3   | 0.6122(10)  | 0.8752(7)   | 0.6507(11)  | 0.027(2)         |
| K4   | 0.1056(6)   | 0.3982(7)   | 0.6909(9)   | 0.0181(14)       |
| K5   | 0.4586(7)   | 0.0656(6)   | 0.6892(9)   | 0.0181(14)       |
| K6   | 0.9516(9)   | 0.5702(6)   | 0.6555(10)  | 0.027(2)         |
| F1   | 0.1361(13)  | 0.9343(12)  | 0.8961(17)  | 0.0118(16)       |
| F2   | 0.068(2)    | 0.877(2)    | 0.466(3)    | 0.032(3)         |
| F3   | 0.2038(14)  | 0.5934(14)  | 0.537(2)    | 0.0231(17)       |
| F4   | 0.3352(18)  | 0.7318(17)  | 0.347(3)    | 0.0290(17)       |
| F5   | 0.750(2)    | 0.211(2)    | 0.443(3)    | 0.032(3)         |
| F6   | 0.7839(12)  | 0.2650(13)  | 0.873(2)    | 0.0118(16)       |
| F7   | -0.0105(18) | 0.0584(16)  | 0.341(3)    | 0.0290(17)       |
| F8   | -0.1237(14) | -0.0765(14) | 0.526(2)    | 0.0231(17)       |
| F9   | 0.3881(18)  | 0.5320(18)  | 0.470(3)    | 0.032(3)         |
| F10  | 0.4597(15)  | 0.5890(13)  | 0.8981(19)  | 0.0118(16)       |
| F11  | 0.5482(14)  | 0.2997(14)  | 0.452(2)    | 0.0231(17)       |
| F12  | -0.2601(17) | -0.6055(19) | 0.314(3)    | 0.0290(17)       |
| F13  | 0.7702(16)  | 0.7268(13)  | 0.943(2)    | 0.0185(19)       |
| F14  | 0.7999(14)  | 0.7213(14)  | 0.416(2)    | 0.0172(17)       |
| F15  | 0.2463(13)  | 0.2225(12)  | 0.398(2)    | 0.0161(18)       |
| F16  | 0.8053(14)  | 0.0696(15)  | 0.572(2)    | 0.0139(16)       |
| F17  | 0.1232(13)  | 0.3959(17)  | 0.425(2)    | 0.0172(17)       |
| F18  | 0.0901(13)  | 0.4034(15)  | 0.9489(18)  | 0.0185(19)       |
| F19  | 0.1534(13)  | 0.7531(14)  | 0.5748(19)  | 0.0139(16)       |
| F20  | 0.5921(13)  | 0.8853(13)  | 0.3986(19)  | 0.0161(18)       |
| F21  | 0.9430(14)  | 0.5837(15)  | 0.406(2)    | 0.0161(18)       |
| F22  | -0.5286(13) | 0.4121(13)  | 0.5645(18)  | 0.0139(16)       |
| F23  | 0.4913(15)  | 0.0706(15)  | 0.436(2)    | 0.0172(17)       |
| F24  | 0.4612(14)  | 0.0895(14)  | 0.947(2)    | 0.0185(19)       |

**Table 12** Selected distances and geometrical parameters (all in Å) in the structure of Er:KYbF<sub>4</sub> at 3.98 GPa.

---

*Yb-F distances*

|             |           |             |           |             |           |
|-------------|-----------|-------------|-----------|-------------|-----------|
| Yb1-F1      | 2.296(17) | Yb3-F5      | 2.19(3)   | Yb5-F4      | 2.17(3)   |
| Yb1-F2      | 2.19(3)   | Yb3-F6      | 2.25(2)   | Yb5-F9      | 2.21(3)   |
| Yb1-F7      | 2.21(3)   | Yb3-F12     | 2.20(4)   | Yb5-F10     | 2.251(19) |
| Yb1-F13     | 2.086(18) | Yb3-F14     | 2.18(3)   | Yb5-F18     | 2.092(17) |
| Yb1-F15     | 2.141(17) | Yb3-F16     | 2.24(2)   | Yb5-F20     | 2.094(18) |
| Yb1-F17     | 2.20(3)   | Yb3-F21     | 2.132(17) | Yb5-F22     | 2.24(2)   |
| Yb1-F19     | 2.27(2)   | Yb3-F24     | 2.14(2)   | Yb5-F23     | 2.22(3)   |
| <Yb1-F>     | 2.20      | <Yb3-F>     | 2.19      | <Yb5-F>     | 2.18      |
| range Yb1-F | 0.21      | range Yb3-F | 0.12      | range Yb5-F | 0.14      |
|             |           |             |           |             |           |
| Yb2-F3      | 2.193(18) | Yb4-F1      | 2.155(16) | Yb6-F5      | 2.27(3)   |
| Yb2-F3      | 2.26(2)   | Yb4-F2      | 2.17(3)   | Yb6-F6      | 2.145(17) |
| Yb2-F4      | 2.17(4)   | Yb4-F7      | 2.15(4)   | Yb6-F11     | 2.258(19) |
| Yb2-F9      | 2.19(2)   | Yb4-F8      | 2.202(18) | Yb6-F11     | 2.19(2)   |
| Yb2-F10     | 2.150(17) | Yb4-F8      | 2.20(2)   | Yb6-F12     | 2.16(3)   |
| Yb2-F17     | 2.20(2)   | Yb4-F14     | 2.22(3)   | Yb6-F22     | 2.21(2)   |
| Yb2-F19     | 2.22(2)   | Yb4-F16     | 2.22(2)   | Yb6-F23     | 2.20(3)   |
| <Yb2-F>     | 2.20      | <Yb4-F>     | 2.19      | <Yb6-F>     | 2.20      |
| range Yb2-F | 0.11      | range Yb4-F | 0.07      | range Yb6-F | 0.13      |

*K-F distances*

|            |           |            |           |            |           |
|------------|-----------|------------|-----------|------------|-----------|
| K1-F1      | 2.78(2)   | K3-F2      | 2.83(4)   | K5-F5      | 2.66(3)   |
| K1-F5      | 2.79(4)   | K3-F4      | 2.94(2)   | K5-F10     | 2.72(3)   |
| K1-F7      | 2.79(2)   | K3-F10     | 2.87(3)   | K5-F12     | 2.72(2)   |
| K1-F13     | 2.50(3)   | K3-F16     | 2.776(17) | K5-F13     | 2.54(2)   |
| K1-F15     | 2.54(2)   | K3-F18     | 2.52(3)   | K5-F17     | 2.666(19) |
| K1-F16     | 2.52(2)   | K3-F19     | 2.57(2)   | K5-F21     | 2.61(3)   |
| K1-F20     | 2.56(2)   | K3-F20     | 2.52(2)   | K5-F23     | 2.54(2)   |
| K1-F22     | 2.888(16) | K3-F21     | 2.49(2)   | K5-F24     | 2.56(2)   |
| <K1-F>     | 2.67      | <K3-F>     | 2.69      | <K5-F>     | 2.63      |
| range K1-F | 0.39      | range K3-F | 0.42      | range K5-F | 0.18      |
|            |           |            |           |            |           |
| K2-F2      | 3.06(3)   | K4-F1      | 2.78(2)   | K6-F6      | 2.93(2)   |
| K2-F6      | 2.81(3)   | K4-F3      | 2.78(2)   | K6-F9      | 2.82(4)   |
| K2-F8      | 2.92(2)   | K4-F9      | 2.93(3)   | K6-F11     | 2.72(2)   |
| K2-F13     | 2.61(2)   | K4-F14     | 2.698(18) | K6-F15     | 2.49(2)   |
| K2-F14     | 2.62(2)   | K4-F17     | 2.65(2)   | K6-F19     | 2.773(16) |
| K2-F15     | 2.49(3)   | K4-F18     | 2.57(2)   | K6-F21     | 2.48(2)   |
| K2-F18     | 2.48(2)   | K4-F20     | 2.55(3)   | K6-F22     | 2.45(2)   |
| K2-F23     | 2.955(19) | K4-F24     | 2.64(2)   | K6-F24     | 2.53(3)   |
| <K2-F>     | 2.74      | <K4-F>     | 2.70      | <K6-F>     | 2.65      |
| range K2-F | 0.58      | range K4-F | 0.38      | range K6-F | 0.48      |

---

**Table 13** Atomic coordinates and isotropic displacement parameters in KYF<sub>4</sub> at 2.04 GPa.

| Atom | x           | y           | z          | U <sub>iso</sub> |
|------|-------------|-------------|------------|------------------|
| Y1   | 0.13331(13) | 0.89179(15) | 0.6661(2)  | 0.0120(3)        |
| Y2   | 0.28454(14) | 0.73332(16) | 0.6762(3)  | 0.0125(2)        |
| Y3   | 0.77952(15) | 0.20568(16) | 0.6537(2)  | 0.0120(3)        |
| Y4   | 0.94207(16) | 0.0588(2)   | 0.6712(3)  | 0.0125(2)        |
| Y5   | 0.45206(17) | 0.5437(2)   | 0.6736(2)  | 0.0120(3)        |
| Y6   | 0.60309(12) | 0.38517(17) | 0.6496(2)  | 0.0125(2)        |
| K1   | 0.2681(4)   | 0.2190(4)   | 0.6451(7)  | 0.0174(8)        |
| K2   | 0.7806(5)   | 0.7114(5)   | 0.6783(7)  | 0.0255(12)       |
| K3   | 0.6117(5)   | 0.8763(4)   | 0.6499(5)  | 0.0174(8)        |
| K4   | 0.1026(4)   | 0.3965(5)   | 0.6832(6)  | 0.0255(12)       |
| K5   | 0.4585(4)   | 0.0652(4)   | 0.6831(7)  | 0.0255(12)       |
| K6   | 0.9484(4)   | 0.5663(4)   | 0.6507(6)  | 0.0174(8)        |
| F1   | 0.1287(10)  | 0.9292(10)  | 0.8867(17) | 0.0197(15)       |
| F2   | 0.0714(9)   | 0.8765(10)  | 0.4500(15) | 0.0188(14)       |
| F3   | 0.2065(8)   | 0.5927(9)   | 0.5287(14) | 0.0237(9)        |
| F4   | 0.3331(10)  | 0.7304(9)   | 0.3428(16) | 0.0255(10)       |
| F5   | 0.7385(10)  | 0.1997(10)  | 0.4338(17) | 0.0188(14)       |
| F6   | 0.7870(9)   | 0.2688(9)   | 0.8594(15) | 0.0197(15)       |
| F7   | -0.0066(10) | 0.0604(9)   | 0.3281(15) | 0.0255(10)       |
| F8   | 0.0789(9)   | -0.0449(9)  | 0.1897(14) | 0.0237(9)        |
| F9   | 0.3901(9)   | 0.5338(9)   | 0.4573(15) | 0.0188(14)       |
| F10  | 0.4515(10)  | 0.5848(10)  | 0.8936(16) | 0.0197(15)       |
| F11  | 0.5506(9)   | 0.2963(9)   | 0.4539(15) | 0.0237(9)        |
| F12  | -0.2600(9)  | -0.6058(10) | 0.3053(14) | 0.0255(10)       |
| F13  | 0.7708(8)   | 0.7285(8)   | 0.9359(15) | 0.0155(12)       |
| F14  | 0.8088(8)   | 0.7257(8)   | 0.4185(14) | 0.0124(9)        |
| F15  | 0.2460(9)   | 0.2233(8)   | 0.3949(14) | 0.0174(12)       |
| F16  | 0.8171(8)   | 0.0827(9)   | 0.5560(13) | 0.0164(11)       |
| F17  | 0.1252(8)   | 0.3952(9)   | 0.4301(13) | 0.0124(9)        |
| F18  | 0.0958(7)   | 0.4045(8)   | 0.9397(12) | 0.0155(12)       |
| F19  | 0.1623(7)   | 0.7643(7)   | 0.5642(11) | 0.0164(11)       |
| F20  | 0.5913(8)   | 0.8848(8)   | 0.4024(14) | 0.0174(12)       |
| F21  | 0.9440(8)   | 0.5822(8)   | 0.3982(14) | 0.0174(12)       |
| F22  | -0.4084(10) | -0.9443(9)  | 0.2391(14) | 0.0164(11)       |
| F23  | 0.4766(7)   | 0.0706(7)   | 0.4222(12) | 0.0124(9)        |
| F24  | 0.4599(8)   | 0.0894(8)   | 0.9446(12) | 0.0155(12)       |

**Table 14** Selected distances and geometrical parameters (all in Å) in the structure of KYF<sub>4</sub> at 2.04 GPa.

---

*Y-F distances*

|            |           |            |           |            |           |
|------------|-----------|------------|-----------|------------|-----------|
| Y1-F1      | 2.289(17) | Y3-F5      | 2.277(17) | Y5-F4      | 2.21(2)   |
| Y1-F2      | 2.311(15) | Y3-F6      | 2.233(15) | Y5-F9      | 2.322(15) |
| Y1-F7      | 2.223(19) | Y3-F12     | 2.24(2)   | Y5-F10     | 2.288(16) |
| Y1-F13     | 2.125(11) | Y3-F14     | 2.259(17) | Y5-F18     | 2.148(10) |
| Y1-F15     | 2.163(11) | Y3-F16     | 2.262(14) | Y5-F20     | 2.168(11) |
| Y1-F17     | 2.266(17) | Y3-F21     | 2.185(11) | Y5-F22     | 2.230(17) |
| Y1-F19     | 2.265(12) | Y3-F24     | 2.155(11) | Y5-F23     | 2.297(15) |
| <Y1-F>     | 2.23      | <Y3-F>     | 2.23      | <Y5-F>     | 2.24      |
| range Y1-F | 0.19      | range Y3-F | 0.12      | range Y5-F | 0.17      |
|            |           |            |           |            |           |
| Y2-F3      | 2.264(12) | Y4-F1      | 2.233(14) | Y6-F5      | 2.215(14) |
| Y2-F3      | 2.243(14) | Y4-F2      | 2.187(13) | Y6-F6      | 2.212(13) |
| Y2-F4      | 2.20(2)   | Y4-F7      | 2.21(2)   | Y6-F11     | 2.247(14) |
| Y2-F9      | 2.190(13) | Y4-F8      | 2.249(13) | Y6-F11     | 2.218(16) |
| Y2-F10     | 2.187(13) | Y4-F8      | 2.240(13) | Y6-F12     | 2.203(19) |
| Y2-F17     | 2.268(15) | Y4-F14     | 2.208(16) | Y6-F22     | 2.266(19) |
| Y2-F19     | 2.265(12) | Y4-F16     | 2.260(14) | Y6-F23     | 2.268(13) |
| <Y2-F>     | 2.23      | <Y4-F>     | 2.23      | <Y6-F>     | 2.23      |
| range Y2-F | 0.08      | range Y4-F | 0.07      | range Y6-F | 0.07      |

*K-F distances*

|            |           |            |           |            |           |
|------------|-----------|------------|-----------|------------|-----------|
| K1-F1      | 2.794(17) | K3-F2      | 2.773(19) | K5-F5      | 2.858(18) |
| K1-F5      | 2.75(2)   | K3-F4      | 2.980(13) | K5-F10     | 2.82(2)   |
| K1-F7      | 2.903(12) | K3-F10     | 2.835(18) | K5-F12     | 2.770(13) |
| K1-F13     | 2.535(18) | K3-F16     | 3.034(10) | K5-F13     | 2.604(15) |
| K1-F15     | 2.541(15) | K3-F18     | 2.524(17) | K5-F17     | 2.774(11) |
| K1-F16     | 2.505(15) | K3-F19     | 2.539(12) | K5-F21     | 2.630(19) |
| K1-F20     | 2.659(14) | K3-F20     | 2.516(15) | K5-F23     | 2.635(14) |
| K1-F22     | 2.797(12) | K3-F21     | 2.492(14) | K5-F24     | 2.652(14) |
| <K1-F>     | 2.69      | <K3-F>     | 2.71      | <K5-F>     | 2.72      |
| range K1-F | 0.40      | range K3-F | 0.54      | range K5-F | 0.25      |
|            |           |            |           |            |           |
| K2-F2      | 3.073(17) | K4-F1      | 2.88(2)   | K6-F6      | 3.038(15) |
| K2-F6      | 2.877(18) | K4-F3      | 2.843(13) | K6-F9      | 2.858(18) |
| K2-F8      | 2.987(14) | K4-F9      | 2.952(16) | K6-F11     | 2.825(15) |
| K2-F13     | 2.613(16) | K4-F14     | 2.835(11) | K6-F15     | 2.572(14) |
| K2-F14     | 2.637(15) | K4-F17     | 2.567(14) | K6-F19     | 3.019(9)  |
| K2-F15     | 2.560(17) | K4-F18     | 2.587(13) | K6-F21     | 2.554(15) |
| K2-F18     | 2.568(14) | K4-F20     | 2.645(18) | K6-F22     | 2.597(16) |
| K2-F23     | 2.737(10) | K4-F24     | 2.629(14) | K6-F24     | 2.551(17) |
| <K2-F>     | 2.76      | <K4-F>     | 2.74      | <K6-F>     | 2.75      |
| range K2-F | 0.51      | range K4-F | 0.38      | range K6-F | 0.49      |

---
